# Supplementary material for: 3PTZ and 3PXZ small molecular hole-transporting materials in polymer light-emitting diodes
Source: Royal Society of Chemistry journal article supplement (doi:10.1039/d3tc01163a), 2023-01-01
Supplement: d3tc01163a1.pdf [file d3tc01163a1.pdf]

## Supplementary Information

# **3PTZ and 3PXZ small molecular hole-transporting materials in polymer light-emitting diodes**

Dong Su Shin<sup>a,†</sup>, Young Jae Park<sup>b,†</sup>, Jae Hyeon Lee<sup>a</sup>, Ji-Yeon Kim<sup>a</sup>, Hyunbok Lee<sup>c</sup>, Kitae Kim<sup>d</sup>, Yeonjin Yi<sup>d</sup>, Ji Eon Kwon<sup>a</sup>, Kyunam Lee<sup>e</sup>, Soo Young Park<sup>e</sup>, Sang-Youp Yim<sup>f</sup>,  
Donghee Park<sup>g,\*</sup>, and Dong Ick Son<sup>a,h,\*</sup>

<sup>a</sup>Institute of Advanced Composite Materials, Korea Institute of Science and Technology, 92 Chudong-ro, Bongdong-eup, Wanju-gun, Jeollabuk-do 55324, Republic of Korea

<sup>b</sup>National Institute for Nanomaterials Technology, Pohang University of Science and Technology, 77, Cheongam-ro, Nam-gu, Pohang-si, Gyeongsangbuk-do 37673, Republic of Korea

<sup>c</sup>Department of Physics, Kangwon National University, 1 Kangwondaehak-gil, Chuncheon-si, Gangwon-do 24341, Republic of Korea

<sup>d</sup>Department of Physics, Yonsei University, 50 Yonsei-ro, Seodaemun-gu, Seoul 03722, Republic of Korea

<sup>e</sup>Department of Materials Science and Engineering, Research Institute of Advanced Materials (RIAM), Seoul National University, 1 Gwankak-ro, Gwanak-gu, Seoul 08826, South Korea

<sup>f</sup>Advanced Photonics Research Institute, Gwangju Institute of Science and Technology, 123 Cheomdangwagi-ro, Buk-gu, Gwangju 61005, Republic of Korea

<sup>g</sup>Center for Opto-Electronic Materials and Devices, Post-Silicon Semiconductor Institute, Korea Institute of Science and Technology, Hwarangro 14 Gil 5, Seongbuk Gu, Seoul, 02792, Republic of Korea

<sup>h</sup>KIST School, Department of Nanomaterials and Nano Science, University of Science and Technology (UST), 217, Gajeong-ro, Yuseong-gu, Daejeon 34113, Republic of Korea

---

\*Corresponding authors. E-mail: eastwing33@kist.re.kr (D. I. Son) Tel.: +82 632198155; fax: +82 632198129.  
pdmtime@kist.re.kr (D. Park) Tel.: +82 29585565; fax: +82 29585103.

† These authors contributed equally to this work.

## **Table of Contents**

- 1. C-V curves and UV-vis spectra of 3PXZ and 3PTZ.**
- 2. AFM images of spin-coated and thermally evaporated 3PXZ films.**
- 3. Schematic illustration of energy band diagram of PLEDs including poly-TPD.**
- 4. TEM image of 3PXZ on Si substrate**
- 5. CIE coordinates of PLEDs**
- 6. Calculated mobilities of 3PXZ and 3PTZ.**

**Table 1. Work function, HOMO, and LUMO results of 3PTZ and 3PXZ by using UPS and IPES measuring equipment.**

**Table 2. Optical properties of PLEDs with 3PTZ and 3PXZ with different thickness**

**Table 3. CIE coordinates of reference PLED, PLED with poly-TPD, PLED with 3PTZ, and PLED with 3PXZ with applied voltages.**

## 1. C-V curves and UV-vis spectra of 3PXZ and 3PTZ.

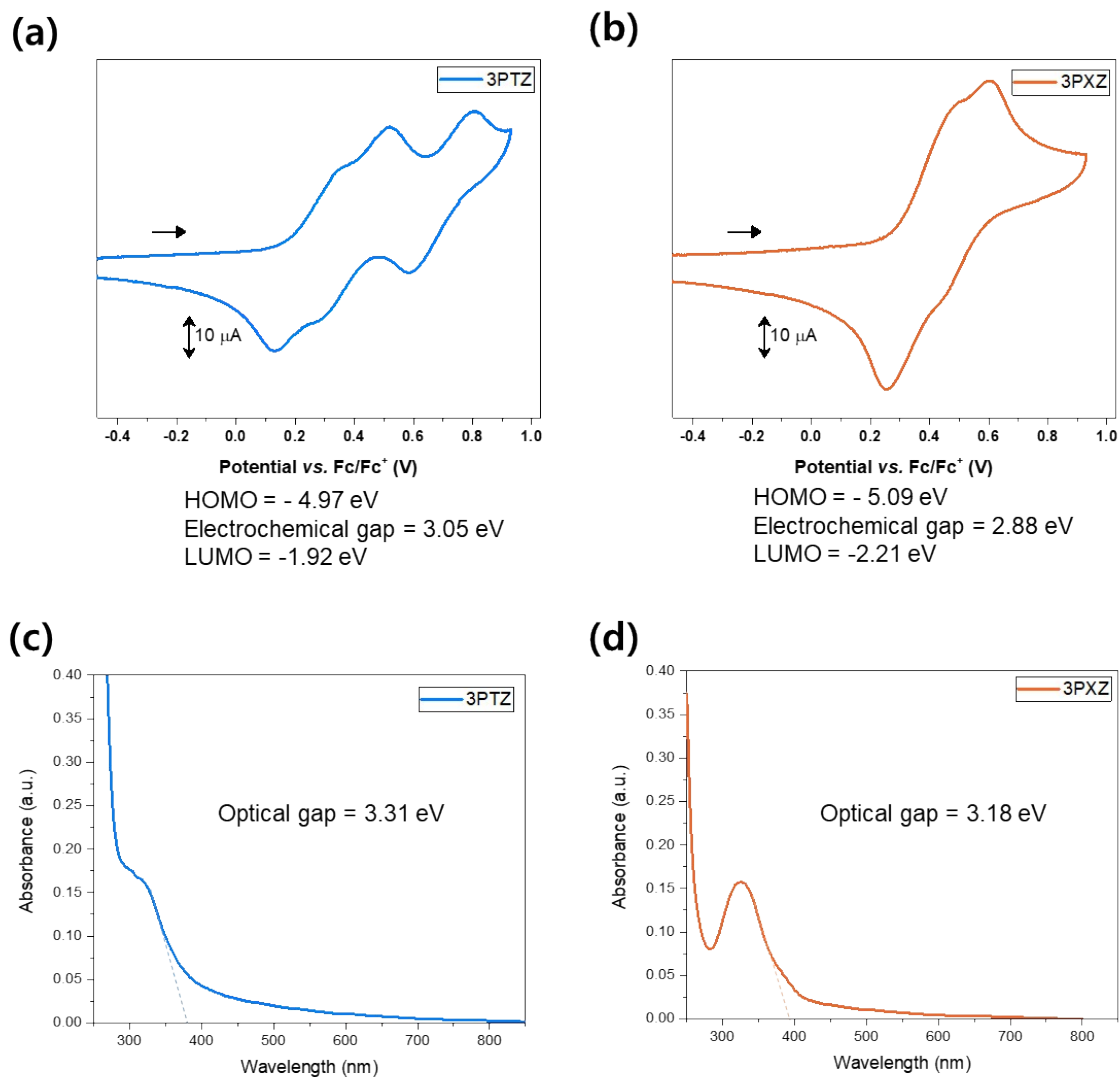

**Figure S1. C-V curves (a, b) and UV-vis spectra (c, d) of 3PXZ and 3PTZ**

Figure S1(a) and (b) show that the HOMO and LUMO levels of the 3PTZ and 3PXZ were obtained from a CV measurement at a scan rate of 20 mV·s<sup>-1</sup>. The HOMO and LUMO levels were calculated from the oxidation initiation potential ( $E_{ox}'$ ) and the reduction initiation potential ( $E_{red}'$ ). The HOMO levels of the 3PTZ and 3PXZ were calculated to be 4.97 and 5.09 eV from the following equation:

$$E_{HOMO} = -I_p = -(E_{ox}' + 4.14) \text{ (eV)},$$

where  $I_p$  is the ionization potential. The LUMO levels of the 3PTZ and 3PXZ were calculated

as 1.92 and 2.21 eV by the following equation:

$$E_{LUMO} = -E.A. = -(E_{red} + 4.14) (eV),$$

where E.A. is the electron affinity.

The optical gaps of the 3PTZ and 3PXZ were derived through the UV-vis spectra with Tauc plot equation to 3.31 and 3.18 eV as shown Figure S1(c) and (d).

2. AFM images of spin-coated and thermally evaporated 3PXZ films.

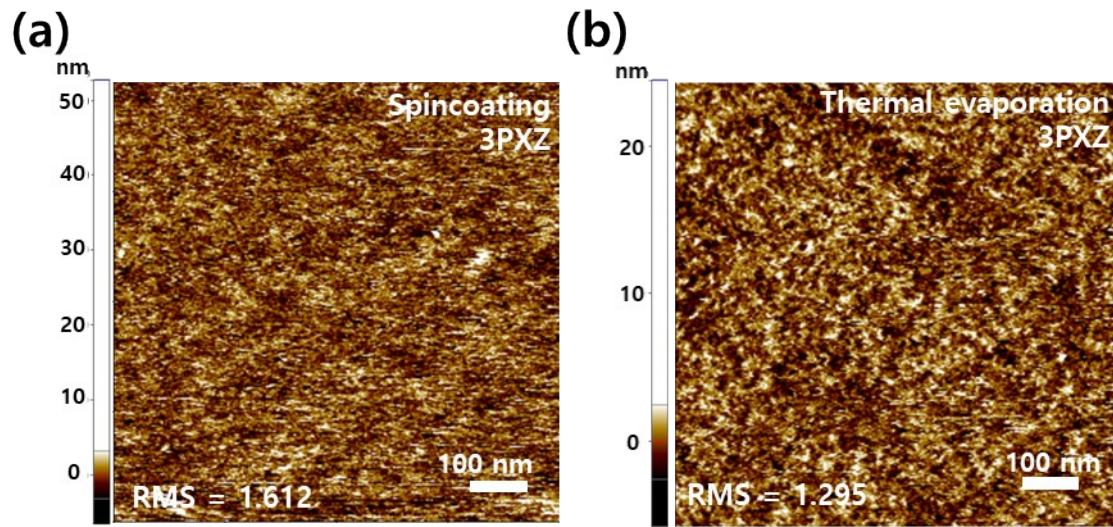

Figure S2. AFM images of (a) spin-coated and (b) thermally evaporated 3PTZ films.

3. Schematic illustration of energy band diagram of PLEDs including poly-TPD.

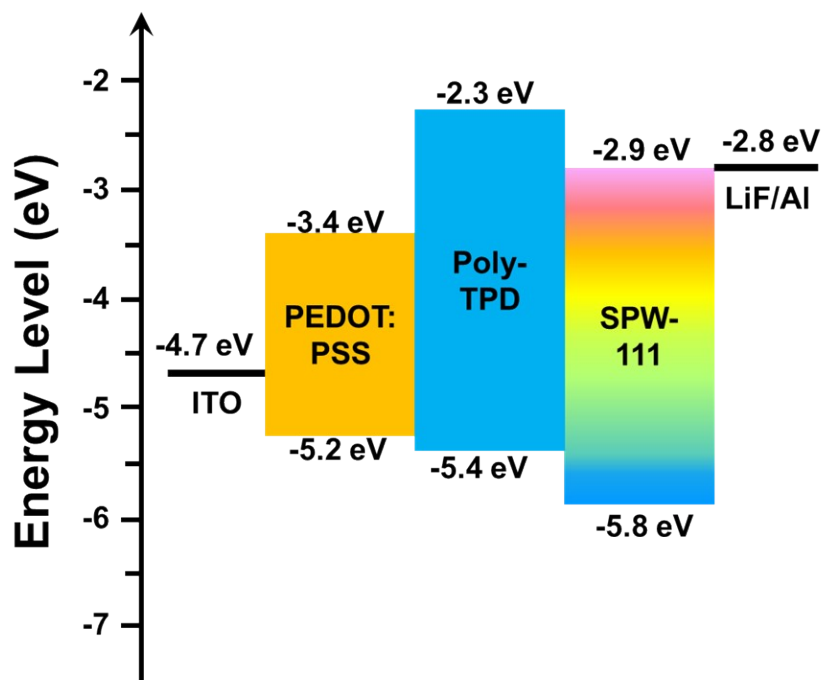

Figure S3. Schematic illustration of energy band diagram of PLED with poly-TPD HTL

#### 4. TEM image of 3PXZ

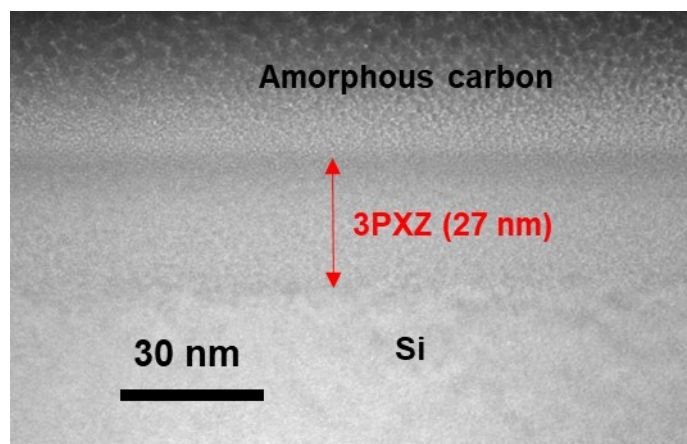

Figure S4. TEM image of 3PXZ on Si substrate

## 5. CIE coordinates of PLEDs.

### CIE chromaticity diagram 1931

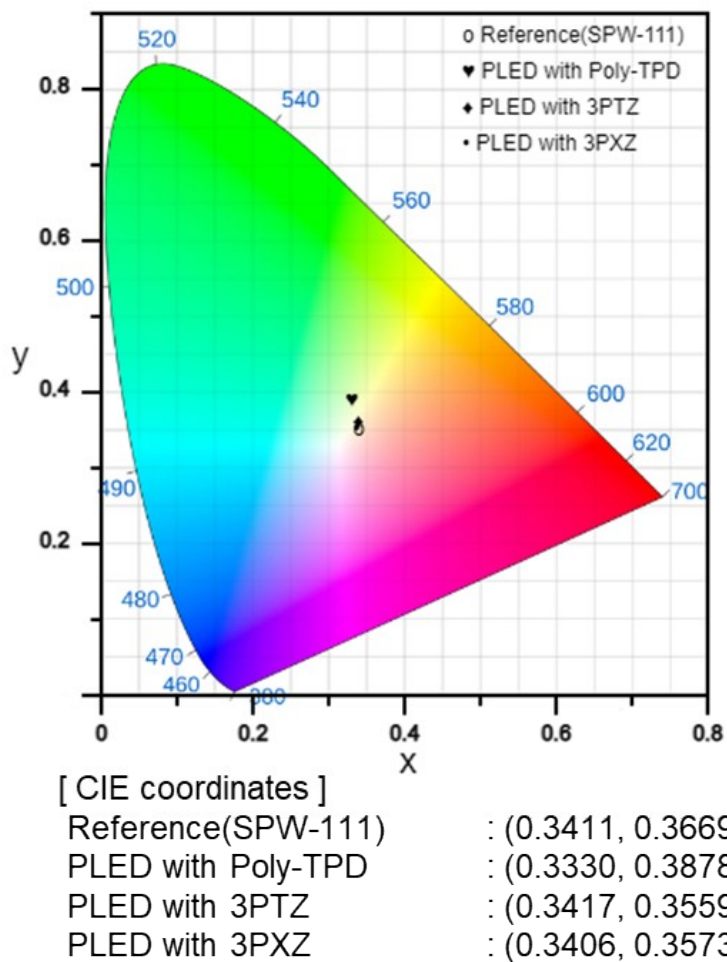

**Figure S5. CIE coordinates of reference PLED, the PLED with poly-TPD, the PLED with 3PTZ, and the PLED with 3PXZ.**



## 6. Calculated mobilities of 3PXZ and 3PTZ.

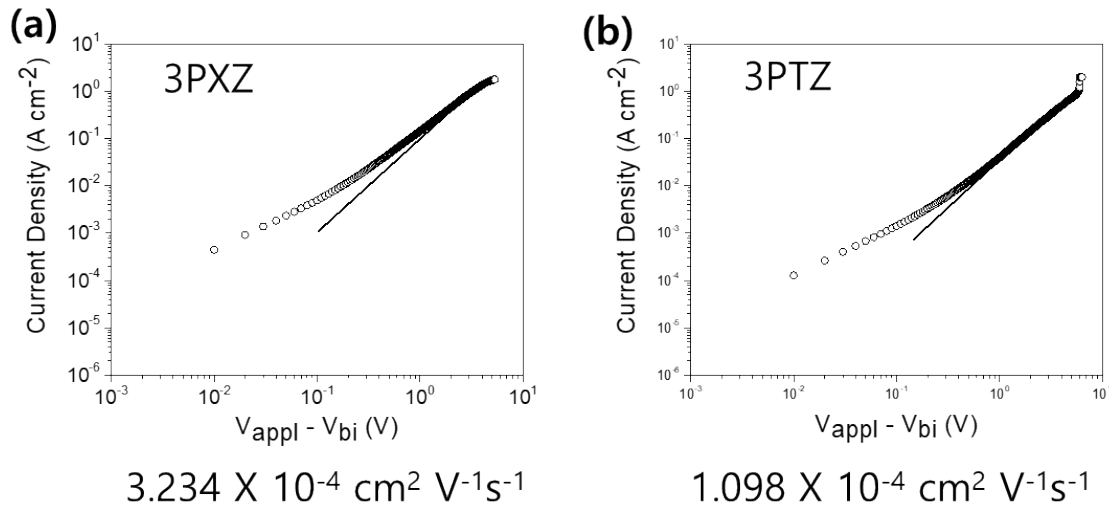

**Figure S6. Calculated mobilities of (a) 3PXZ and (b) 3PTZ**

In order to calculate the charge carrier mobilities of 3PXZ and 3PTZ, the J-V curves of organic devices (Glass/ITO/PEDOT:PSS/small molecular material/MoO<sub>3</sub>/Ag) were investigated. The carrier mobilities of 3PXZ and 3PTZ are calculated using Mott-Gurney law (1) from SCLC of fitted J-V curve [1, 2]. The Mott-Gurney law is:

$$J = \frac{9}{8} \varepsilon \varepsilon_0 \mu \frac{V^2}{L^3} \quad (1)$$

where  $J$  is the current density,  $\varepsilon$  is the relative dielectric constant of organic device,  $\varepsilon_0$  is the permittivity of free space,  $\mu$  is the charge carrier mobility,  $V$  is the voltage drop across the device ( $V = V_{\text{appl}} - V_{\text{bi}}$ , where  $V_{\text{appl}}$  is the applied voltage and  $V_{\text{bi}}$  is the built-in voltage), and  $L$  is the thickness of the device.

[1] C. Goh, R. J. Kline, M. D. McGehee, E. N. Kadnikova, J. M. Frechet, Molecular-weight-dependent mobilities in regioregular poly(3-hexyl-thiophene) diodes, *J. Appl. Phys. Lett.* 2005, 86 (2005) 122110, <https://doi.org/10.1063/1.1891301>

[2] P. W. M. Blom, M. J. M. de Jong, M. G. van Munster, Electric-field and temperature dependence of the hole mobility in poly(p-phenylene vinylene), *Phys. Rev. B* 55 (1997) R656(R), <https://doi.org/10.1103/PhysRevB.55.R656>

**Table 1. Work function, HOMO, and LUMO results of 3PTZ and 3PXZ by using UPS and IPES measuring equipment.**

|                             | <b>3PXZ</b> | <b>3PTZ</b> |
|-----------------------------|-------------|-------------|
| <b>Work Function</b>        | 4.516 eV    | 4.473 eV    |
| <b>E<sub>F</sub> – HOMO</b> | 0.846 eV    | 0.952 eV    |
| <b>E<sub>F</sub> – LUMO</b> | 2.605 eV    | 2.614 eV    |
| <b>(Transport) Band Gap</b> | 3.451 eV    | 3.566 eV    |
| <b>HOMO (IE)</b>            | 5.362 eV    | 5.425 eV    |
| <b>LUMO (EA)</b>            | 1.911 eV    | 1.859 eV    |

**Table S1. Work function, HOMO, and LUMO results of 3PTZ and 3PXZ by using UPS and IPES**

**Table 2. Optical properties of PLEDs with 3PTZ and 3PXZ with different thickness**

|               | Maximum<br>luminance<br>(cd/m <sup>2</sup> ) | Current<br>efficiency (cd/A) | Power efficiency<br>(lm/W) | Quantum<br>efficiency |
|---------------|----------------------------------------------|------------------------------|----------------------------|-----------------------|
| 20 nm of 3PTZ | 2672 @ 11 V                                  | 0.47 @ 8.5 V                 | 0.18 @ 7.5 V               | 0.22 @ 8.5 V          |
| 27 nm of 3PTZ | 2808 @ 12.5 V                                | 1.07 @ 9.5 V                 | 0.38 @ 8 V                 | 0.53 @ 9.5 V          |
| 40 nm of 3PTZ | 3023 @ 11 V                                  | 0.63 @ 8.5 V                 | 0.26 @ 7 V                 | 0.31 @ 8.5 V          |
| 20 nm of 3PXZ | 1158 @ 18 V                                  | 0.72 @ 14 V                  | 0.17 @ 12.5 V              | 0.39 @ 14 V           |
| 27 nm of 3PXZ | 2755 @ 13 V                                  | 0.97 @ 10 V                  | 0.33 @ 8.5 V               | 0.49 @ 10 V           |
| 40 nm of 3PXZ | 1319 @ 19.5 V                                | 0.89 @ 14 V                  | 0.22 @ 11 V                | 0.50 @ 14 V           |

**Table S2. Optical properties of PLEDs with 3PTZ and 3PXZ with different thickness.**

**Table 3. CIE coordinates of reference PLED, PLED with poly-TPD, PLED with 3PTZ, and PLED with 3PXZ with applied voltages.**

|                           | <b>voltage (V)</b> | <b>x</b> | <b>Y</b> |
|---------------------------|--------------------|----------|----------|
| <b>Reference PLED</b>     | 6                  | 0.3699   | 0.3929   |
|                           | 8                  | 0.3541   | 0.3955   |
|                           | 10                 | 0.3468   | 0.3941   |
|                           | 12                 | 0.3421   | 0.3862   |
|                           | 14                 | 0.328    | 0.3582   |
| <b>PLED with Poly-TPD</b> | 6                  | 0.3224   | 0.3848   |
|                           | 8                  | 0.311    | 0.3719   |
|                           | 10                 | 0.3117   | 0.3531   |
|                           | 12                 | 0.3037   | 0.274    |
|                           | 14                 | 0.2959   | 0.2959   |
| <b>PLED with 3PTZ</b>     | 6                  | 0.3614   | 0.3855   |
|                           | 8                  | 0.3499   | 0.3858   |
|                           | 10                 | 0.3416   | 0.3853   |
|                           | 12                 | 0.3397   | 0.3788   |
|                           | 14                 | 0.3516   | 0.3564   |
| <b>PLED with 3PXZ</b>     | 6                  | 0.3633   | 0.3846   |
|                           | 8                  | 0.3483   | 0.3853   |
|                           | 10                 | 0.3398   | 0.3843   |
|                           | 12                 | 0.3375   | 0.3778   |
|                           | 14                 | 0.3462   | 0.3528   |

**Table S3. CIE coordinates of reference PLED, PLED with poly-TPD, PLED with 3PTZ, and PLED with 3PXZ with applied voltages.**
